# Supplementary material for: The Luminescence of 1,8-Diazafluoren-9-One/Titanium Dioxide Composite Thin Films for Optical Application
Source: MDPI journal article supplement (doi:10.3390/ma13133014), 2020-07-06
Supplement: s1 [file s1]

*Supplementary Materials*

# The Luminescence of 1,8-Diazafluoren-9-One/Titanium Dioxide Composite Thin Films for Optical Application

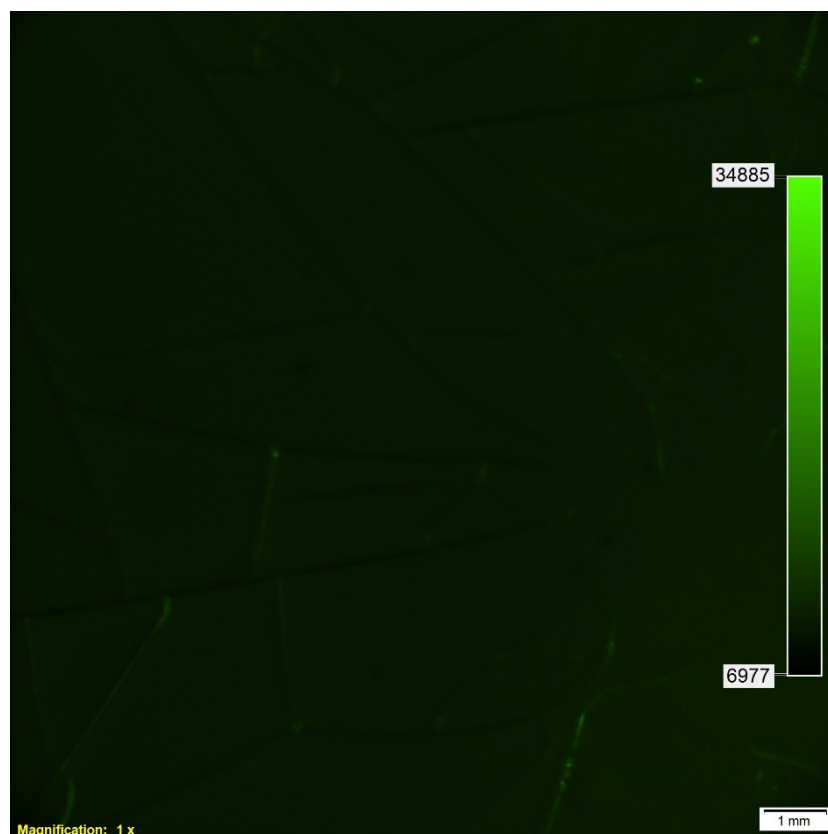

**Figure S1.** Negative control of the fluorescence micrograph without glycine.

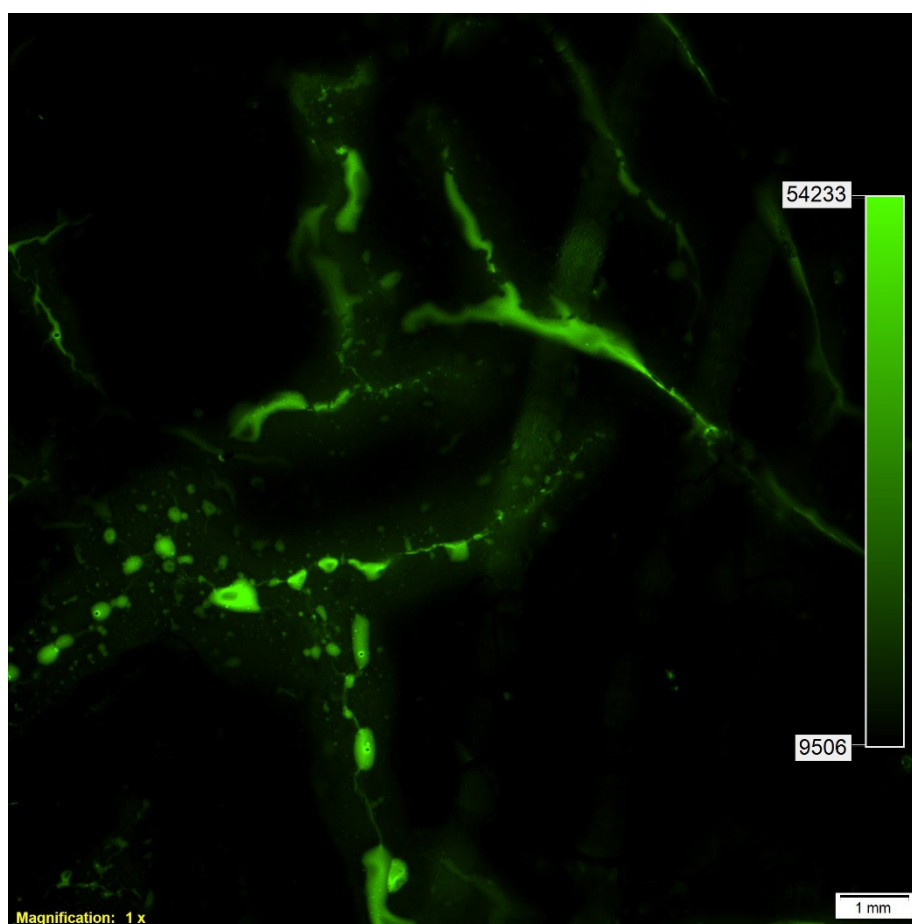

Figure S2. Fluorescence for 2x10<sup>-2</sup>M with glycine, when the best fluorescence was obtained.

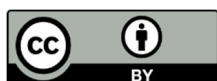

© 2020 by the authors. Submitted for possible open access publication under the terms and conditions of the Creative Commons Attribution (CC BY) license (<http://creativecommons.org/licenses/by/4.0/>).
